# Supplementary material for: Antibody prophylaxis may mask subclinical SIV infections in macaques
Source: Springer Nature journal article supplement (doi:10.1038/s41586-024-08500-y), 2025-02-05
Supplement: MOESM1 [file 41586_2024_8500_MOESM1_ESM.pdf]

---

**Supplementary information**

---

**Antibody prophylaxis may mask subclinical SIV infections in macaques**

---

In the format provided by the authors and unedited

**Table of Contents**

| <b>Supplementary Tables</b>                                                                       | <b>Page</b> |
|---------------------------------------------------------------------------------------------------|-------------|
| <b>Table 1.</b> Study mAb neutralization IC50 and IC80 titers against SIV isolates                | 3           |
| <b>Table 2.</b> Control group barcode sequencing                                                  | 4           |
| <b>Table 3.</b> ITS102.03 group barcode sequencing                                                | 5           |
| <b>Table 4.</b> ITS103.01 group barcode sequencing                                                | 6           |
| <b>Table 5.</b> Partially/fully neutralizing mAb infusion and challenge study animal demographics | 7           |
| <b>Table 6.</b> Barcoded virus challenge study animal demographics                                | 8           |
| <b>References</b>                                                                                 | 9           |

18 **Supplementary Table 1. Study mAb neutralization IC50 and IC80 titers against SIV isolates**

19 Neutralization curves are shown in Extended Fig. 1A.

| mAb       | Virus                    |       |                           |       |                  |       |
|-----------|--------------------------|-------|---------------------------|-------|------------------|-------|
|           | <u>SIVsmE660.A8.CP3C</u> |       | <u>SIVsmE660.2A5.CR54</u> |       | <u>SIVmac239</u> |       |
|           | IC50                     | IC80  | IC50                      | IC80  | IC50             | IC80  |
| ITS01     | 0.013                    | 0.046 | 0.154                     | >50   | >50              | >50   |
| ITS06.02  | 0.016                    | >50   | >50                       | >50   | >50              | >50   |
| ITS102.03 | 0.072                    | 0.244 | 0.228                     | 0.879 | 0.867            | 3.0   |
| ITS103.01 | 0.015                    | 0.052 | 0.017                     | 0.052 | 0.007            | 0.022 |

20

21

22 **Supplementary Table 2. Control group barcode sequencing**

23 Barcodes are colored according to legend in Fig. 4A.

| <b>Animal</b> | <b>Plasma timepoint<br/>(Days post first challenge)</b> | <b>Dominant<br/>barcode</b> |
|---------------|---------------------------------------------------------|-----------------------------|
| B1-1          | 18                                                      | A                           |
|               | 28                                                      | A                           |
|               | 42                                                      | A                           |
| B1-2          | 18                                                      | A                           |
|               | 28                                                      | A                           |
|               | 42                                                      | A                           |
| B1-3          | 18                                                      | A                           |
|               | 28                                                      | A                           |
|               | 42                                                      | A                           |
| B1-4          | 18                                                      | A                           |
|               | 28                                                      | A                           |
|               | 42                                                      | A                           |

24

25

26 **Supplementary Table 3. ITS102.03 group barcode sequencing**

27 Barcodes are colored according to legend in Fig. 4A.

| <b>Animal</b> | <b>Plasma timepoint<br/>(Days post first challenge)</b> | <b>Dominant<br/>barcode</b> | <b>Other barcodes and<br/>abundance<br/>(percent of total reads)</b> |
|---------------|---------------------------------------------------------|-----------------------------|----------------------------------------------------------------------|
| B2-1          | 18                                                      | A                           |                                                                      |
|               | 21                                                      | A                           |                                                                      |
| B2-2          | 21                                                      | B                           |                                                                      |
|               | 32                                                      | B                           |                                                                      |
|               | 39                                                      | B                           |                                                                      |
|               | 42                                                      | B                           |                                                                      |
| B2-3          | 21                                                      | A                           |                                                                      |
| B2-4          | 21                                                      | B                           |                                                                      |
|               | 32                                                      | B                           |                                                                      |
| B2-5          | 18                                                      | B                           |                                                                      |
|               | 21                                                      | B                           |                                                                      |
|               | 32                                                      | B                           | C(0.02)                                                              |
| B2-6          | 21                                                      | A                           |                                                                      |
|               | 32                                                      | A                           |                                                                      |

28

29 **Supplementary Table 4. ITS103.01 group barcode sequencing**  
 30 Barcodes are colored according to legend in Fig. 4A. “N/R” indicates that no barcode sequences  
 31 were able to be recovered at a given timepoint.

| Animal | Plasma timepoint<br>(Days post first<br>challenge) | Dominant<br>barcode | Other barcodes and<br>abundance<br>(percent of total reads) |
|--------|----------------------------------------------------|---------------------|-------------------------------------------------------------|
| B3-1   | 46                                                 | G                   |                                                             |
|        | 49                                                 | G                   |                                                             |
|        | 53                                                 | G                   |                                                             |
|        | 56                                                 | G                   | H(0.5)                                                      |
|        | 60                                                 | G                   | H(0.08), A(0.01)                                            |
|        | 63                                                 | G                   | H(0.1)                                                      |
|        | 67                                                 | G                   | H(0.07)                                                     |
| B3-2   | 35                                                 | N/R                 |                                                             |
|        | 63                                                 | N/R                 |                                                             |
|        | 71                                                 | A                   | E(20)                                                       |
|        | 77                                                 | A                   | B(0.038)                                                    |
|        | 84                                                 | A                   | B(0.037)                                                    |
| B3-3   | 49                                                 | N/R                 |                                                             |
|        | 67                                                 | A                   |                                                             |
|        | 71                                                 | A                   | I(0.04)                                                     |
|        | 74                                                 | A                   |                                                             |
|        | 77                                                 | A                   |                                                             |
|        | 84                                                 | A                   |                                                             |
| B3-4   | 35                                                 | F                   |                                                             |
|        | 56                                                 | H                   |                                                             |
|        | 67                                                 | H                   |                                                             |
|        | 63                                                 | H                   | I(0.0015)                                                   |
|        | 67                                                 | H                   |                                                             |
|        | 71                                                 | H                   |                                                             |
|        | 74                                                 | H                   |                                                             |
| B3-5   | 35                                                 | N/R                 |                                                             |
|        | 67                                                 | A                   |                                                             |
|        | 67                                                 | A                   |                                                             |
|        | 71                                                 | A                   | G(0.001)                                                    |
|        | 74                                                 | A                   |                                                             |
|        | 77                                                 | A                   |                                                             |
| B3-6   | 35                                                 | N/R                 |                                                             |
|        | 60                                                 | I                   | A(12)                                                       |
|        | 67                                                 | I                   | A(16)                                                       |
|        | 71                                                 | I                   | A(39), F(0.0026), E(0.0008)                                 |

32 **Supplementary Table 5. Partially/fully neutralizing mAb infusion and challenge study animal**  
 33 **demographics**

34 M = male, F = female. Age and weight were recorded at the start of the study. “TFP” denotes *TRIM5*  
 35 alleles 1–5, “Q” denotes alleles 6–11, and “Cyp” indicates allele 12<sup>1</sup>. Animals that expressed MHC  
 36 alleles (associated with control of virus replication<sup>2,3</sup>) *Mamu-A\*01*, *Mamu-B\*08*, or *Mamu-B\*17* are  
 37 denoted by “+” signs.

| Animal | Sex | Age (years) | Weight (kg) | Trim5a genotype | <i>Mamu-A*01</i> | <i>Mamu-B*08</i> | <i>Mamu-B*17</i> |
|--------|-----|-------------|-------------|-----------------|------------------|------------------|------------------|
| G1-1   | M   | 2.6         | 4.50        | TFP/TFP         | –                | –                | –                |
| G1-2   | M   | 4.6         | 6.44        | TFP/Q           | –                | –                | +                |
| G1-3   | M   | 4.7         | 6.70        | TFP/Q           | –                | –                | –                |
| G1-4   | M   | 5.0         | 7.80        | TFP/Q           | –                | –                | –                |
| G1-5   | M   | 2.7         | 4.26        | TFP/TFP         | –                | –                | +                |
| G1-6   | F   | 5.0         | 6.77        | Q/Cyp           | –                | –                | –                |
| G2-1   | M   | 5.0         | 7.14        | Q/Q             | –                | –                | –                |
| G2-2   | M   | 4.6         | 6.46        | TFP/Q           | –                | –                | –                |
| G2-3   | M   | 5.0         | 8.56        | TFP/TFP         | –                | –                | –                |
| G2-4   | M   | 4.7         | 8.84        | TFP/Q           | –                | –                | –                |
| G2-5   | M   | 5.0         | 5.84        | TFP/Q           | –                | –                | –                |
| G2-6   | F   | 5.0         | 4.76        | TFP/TFP         | –                | –                | –                |
| G3-1   | M   | 4.7         | 8.56        | TFP/TFP         | –                | –                | –                |
| G3-2   | M   | 4.8         | 8.00        | TFP/Q           | –                | –                | –                |
| G3-3   | M   | 4.8         | 7.50        | TFP/Q           | –                | –                | +                |
| G3-4   | M   | 3.0         | 4.08        | TFP/Q           | +                | –                | –                |
| G3-5   | F   | 5.0         | 7.46        | TFP/TFP         | –                | –                | –                |
| G3-6   | F   | 5.0         | 7.40        | Q/Q             | –                | –                | –                |
| G4-1   | M   | 5.0         | 8.26        | TFP/Q           | –                | –                | –                |
| G4-2   | M   | 4.7         | 7.04        | TFP/Q           | –                | –                | –                |
| G4-3   | M   | 5.0         | 9.92        | TFP/Q           | –                | –                | –                |
| G4-4   | M   | 5.0         | 7.86        | TFP/TFP         | –                | –                | –                |
| G4-5   | M   | 3.0         | 4.20        | TFP/Q           | –                | –                | –                |
| G4-6   | F   | 4.7         | 5.92        | TFP/Q           | –                | –                | –                |
| G5-1   | M   | 4.8         | 8.78        | TFP/Q           | –                | –                | –                |
| G5-2   | M   | 2.8         | 5.10        | TFP/Q           | –                | –                | –                |
| G5-3   | M   | 4.6         | 7.96        | TFP/Q           | –                | –                | +                |
| G5-4   | M   | 5.0         | 7.62        | TFP/Q           | –                | –                | +                |
| G5-5   | M   | 5.0         | 7.60        | TFP/TFP         | –                | –                | –                |
| G5-6   | F   | 5.0         | 5.58        | TFP/Q           | –                | +                | –                |

38

39 **Supplementary Table 6. Barcoded virus challenge study animal demographics**

40 M = male, F = female. Age and weight were recorded at the start of the study.

| <b>Animal</b> | <b>Sex</b> | <b>Age (years)</b> | <b>Weight (kg)</b> |
|---------------|------------|--------------------|--------------------|
| B1-1          | M          | 2.8                | 3.62               |
| B1-2          | M          | 2.7                | 3.82               |
| B1-3          | M          | 2.9                | 3.9                |
| B1-4          | M          | 2.7                | 4.54               |
| B2-1          | M          | 2.8                | 3.76               |
| B2-2          | M          | 2.8                | 3.62               |
| B2-3          | M          | 3.0                | 5.08               |
| B2-4          | M          | 3.0                | 3.92               |
| B2-5          | M          | 2.5                | 3.7                |
| B2-6          | M          | 2.7                | 4.18               |
| B3-1          | M          | 2.6                | 3.66               |
| B3-2          | M          | 2.9                | 4.92               |
| B3-3          | M          | 2.9                | 4.02               |
| B3-4          | M          | 3.0                | 4.0                |
| B3-5          | M          | 2.8                | 3.72               |
| B3-6          | M          | 2.8                | 3.88               |

41

42

43



44 **References**

- 45 1 Lim, S. Y. *et al.* TRIM5 $\alpha$  Modulates Immunodeficiency Virus Control in Rhesus Monkeys.  
46 *PLoS pathogens* **6**, e1000738 (2010).
- 47 2 Zhang, Z. Q. *et al.* Mamu-A\*01 allele-mediated attenuation of disease progression in  
48 simian-human immunodeficiency virus infection. *J Virol* **76**, 12845-12854 (2002).  
49 <https://doi.org/10.1128/jvi.76.24.12845-12854.2002>
- 50 3 Martins, M. A. *et al.* Mamu-B\*17(+) Rhesus Macaques Vaccinated with env, vif, and nef  
51 Manifest Early Control of SIVmac239 Replication. *J Virol* **92** (2018).
